# Supplementary material
Source: PubMed Central journal article supplement (PMC7321869)
Supplement: NIHMS1579393-supplement-Supplemental_Digital_Content_2.pdf [file NIHMS1579393-supplement-Supplemental_Digital_Content_2.pdf]

**Appendix 1. Baseline Characteristics and Primary and Secondary Outcomes of Patients Included in and Excluded From Final Cohort**

| Characteristic                                                                                                                                                                                                                                                                                                                                                                                                                                                                                                                                                                                                                                                                                                                                                                                   | Included<br>n=18,162 | Excluded*<br>n=10,893 |
|--------------------------------------------------------------------------------------------------------------------------------------------------------------------------------------------------------------------------------------------------------------------------------------------------------------------------------------------------------------------------------------------------------------------------------------------------------------------------------------------------------------------------------------------------------------------------------------------------------------------------------------------------------------------------------------------------------------------------------------------------------------------------------------------------|----------------------|-----------------------|
| Age (years)                                                                                                                                                                                                                                                                                                                                                                                                                                                                                                                                                                                                                                                                                                                                                                                      | 29.7 ± 5.4           | 29.0 ± 5.6            |
| Pre-pregnancy BMI (kg/m <sup>2</sup> )                                                                                                                                                                                                                                                                                                                                                                                                                                                                                                                                                                                                                                                                                                                                                           | 27.2 ± 6.9           | 26.5 ± 6.8            |
| Gestational weight gain category†                                                                                                                                                                                                                                                                                                                                                                                                                                                                                                                                                                                                                                                                                                                                                                |                      |                       |
| Inadequate                                                                                                                                                                                                                                                                                                                                                                                                                                                                                                                                                                                                                                                                                                                                                                                       | 3740 (22.1)          | 2372 (24.0)           |
| Adequate                                                                                                                                                                                                                                                                                                                                                                                                                                                                                                                                                                                                                                                                                                                                                                                         | 4870 (28.7)          | 2467 (24.9)           |
| Excessive                                                                                                                                                                                                                                                                                                                                                                                                                                                                                                                                                                                                                                                                                                                                                                                        | 8332 (49.2)          | 5060 (51.1)           |
| Race                                                                                                                                                                                                                                                                                                                                                                                                                                                                                                                                                                                                                                                                                                                                                                                             |                      |                       |
| White                                                                                                                                                                                                                                                                                                                                                                                                                                                                                                                                                                                                                                                                                                                                                                                            | 12626 (69.5)         | 7227 (66.3)           |
| Black or African American                                                                                                                                                                                                                                                                                                                                                                                                                                                                                                                                                                                                                                                                                                                                                                        | 3832 (21.1)          | 2355 (21.6)           |
| Other/Not Specified                                                                                                                                                                                                                                                                                                                                                                                                                                                                                                                                                                                                                                                                                                                                                                              | 1704 (9.4)           | 1311 (12.0)           |
| Ethnicity                                                                                                                                                                                                                                                                                                                                                                                                                                                                                                                                                                                                                                                                                                                                                                                        |                      |                       |
| Hispanic or Latino                                                                                                                                                                                                                                                                                                                                                                                                                                                                                                                                                                                                                                                                                                                                                                               | 253 (1.4)            | 268 (2.5)             |
| Not Hispanic or Latino                                                                                                                                                                                                                                                                                                                                                                                                                                                                                                                                                                                                                                                                                                                                                                           | 16393 (90.3)         | 9028 (82.9)           |
| Declined/Not Specified                                                                                                                                                                                                                                                                                                                                                                                                                                                                                                                                                                                                                                                                                                                                                                           | 1516 (8.3)           | 1597 (14.7)           |
| Current smoker                                                                                                                                                                                                                                                                                                                                                                                                                                                                                                                                                                                                                                                                                                                                                                                   | 1715 (10.0)          | 1592 (15.5)           |
| Pre-existing diabetes                                                                                                                                                                                                                                                                                                                                                                                                                                                                                                                                                                                                                                                                                                                                                                            | 310 (1.7)            | 161 (1.5)             |
| First delivery                                                                                                                                                                                                                                                                                                                                                                                                                                                                                                                                                                                                                                                                                                                                                                                   | 8029 (46.1)          | 4937 (46.1)           |
| <b>Outcome</b>                                                                                                                                                                                                                                                                                                                                                                                                                                                                                                                                                                                                                                                                                                                                                                                   |                      |                       |
| Preeclampsia                                                                                                                                                                                                                                                                                                                                                                                                                                                                                                                                                                                                                                                                                                                                                                                     | 1249 (6.9)           | 799 (7.3)             |
| Preterm preeclampsia                                                                                                                                                                                                                                                                                                                                                                                                                                                                                                                                                                                                                                                                                                                                                                             | 489 (2.7)            | 386 (3.5)             |
| Term preeclampsia                                                                                                                                                                                                                                                                                                                                                                                                                                                                                                                                                                                                                                                                                                                                                                                | 760 (4.2)            | 413 (3.8)             |
| Severe maternal morbidity                                                                                                                                                                                                                                                                                                                                                                                                                                                                                                                                                                                                                                                                                                                                                                        | 588 (3.2)            | 430 (4.0)             |
| Placental abruption                                                                                                                                                                                                                                                                                                                                                                                                                                                                                                                                                                                                                                                                                                                                                                              | 254 (1.4)            | 234 (2.2)             |
| Gestational Diabetes                                                                                                                                                                                                                                                                                                                                                                                                                                                                                                                                                                                                                                                                                                                                                                             | 1177 (6.5)           | 645 (6.0)             |
| Composite neonatal morbidity‡                                                                                                                                                                                                                                                                                                                                                                                                                                                                                                                                                                                                                                                                                                                                                                    | 4420 (24.3)          | 3728 (34.1)           |
| BMI, body mass index<br>Data are n (%) or mean ± standard deviation<br>*Data for excluded patients includes those with no prenatal record (n=5570) and those with a prenatal record but with <2 recorded blood pressures < 20 weeks' gestation (n=5323).<br>†Gestational weight gain defined according to Institute of Medicine. Weight gain during pregnancy: reexamining the guidelines. Washington, DC: National Academies Press; 2009. Due to missing data, subgroup totals do not add up to column totals.<br>‡Composite neonatal morbidity includes any of the following: intrauterine fetal demise after 20 weeks' gestation, neonatal death within 28 days of life, 5-minute Apgar < 7, neonatal intensive care unit admission, small-for-gestational-age birthweight, or preterm birth. |                      |                       |

Sutton EF, Rogan SC, Lopa S, Sharbaugh D, Muldoon MF, Catov JM. Early pregnancy blood pressure elevations and risk for maternal and neonatal morbidity. *Obstet Gynecol* 2020;135.

The authors provided this information as a supplement to their article.

©2020 American College of Obstetricians and Gynecologists.

## Appendix 2. Variable Sources

| Variable                               | Variable Source                                                                                                                                                                                                                                                                                                                                                                                                                                                                                                                                                                                                                                                                                                                                              |
|----------------------------------------|--------------------------------------------------------------------------------------------------------------------------------------------------------------------------------------------------------------------------------------------------------------------------------------------------------------------------------------------------------------------------------------------------------------------------------------------------------------------------------------------------------------------------------------------------------------------------------------------------------------------------------------------------------------------------------------------------------------------------------------------------------------|
| Age                                    | Calculated using maternal date of birth and delivery date                                                                                                                                                                                                                                                                                                                                                                                                                                                                                                                                                                                                                                                                                                    |
| Pre-pregnancy body mass index (PpBMI)  | (Weight measured at first prenatal visit, kg) / (Height reported at delivery, m) <sup>2</sup><br><br>*Note: If weight measured at first prenatal visit is missing, use reported pre-gravid weight, reported at delivery                                                                                                                                                                                                                                                                                                                                                                                                                                                                                                                                      |
| Gestational weight gain (GWG) category | GWG=Weight at admission, kg – Pre-pregnancy weight, kg<br><br>Calculated, based on Institute of Medicine guidelines (Institute of Medicine. Weight gain during pregnancy: reexamining the guidelines. Washington, DC: National Academies Press; 2009)                                                                                                                                                                                                                                                                                                                                                                                                                                                                                                        |
| Race                                   | Recorded at delivery admission;<br><br>'Other/Not Specified' includes: Chinese, Other Asian, Filipino, Guam/Chamorro, Indian (Asian), Japanese, Korean, Alaska Native, American Indian, Other Pacific Islander, Hawaiian, Samoan, Vietnamese, Declined, Not Specified, missing                                                                                                                                                                                                                                                                                                                                                                                                                                                                               |
| Ethnicity                              | Recorded at delivery admission;<br><br>'Declined/Not Specified' includes: Declined, Not Specified, missing                                                                                                                                                                                                                                                                                                                                                                                                                                                                                                                                                                                                                                                   |
| Current smoker                         | Recorded at delivery admission;<br><br>'No' includes: 'Never smoker,' 'Yes, former smoker quit more than 12 months ago,' or 'Yes, former smoker quit within the past 12 months'<br><br>'Yes' includes: 'Yes, smoke every day,' 'Yes, smoke some days,' or 'Yes, smoker, current status unknown'                                                                                                                                                                                                                                                                                                                                                                                                                                                              |
| Pre-existing diabetes                  | Type 1 Diabetes:<br>ICD-9: 250.01; 250.03; 250.11; 250.13; 250.21; 250.23; 250.31; 250.33; 250.41; 250.43; 250.51; 250.53; 250.61; 250.63; 250.71; 250.73; 250.81; 250.83; 250.91; 250.93;<br>ICD-10: O24.011; O24.012; O24.013; O24.02; O24.03<br><br>Type 2 Diabetes:<br>ICD-9: 250.00; 250.02; 250.10; 250.12; 250.20; 250.22; 250.30; 250.32; 250.40; 250.42; 250.50; 250.52; 250.60; 250.62; 250.70; 250.72; 250.80; 250.82; 250.90; 250.92;<br>ICD-10: O24.111; O24.112; O24.113; O24.119; O24.12; O24.13<br><br>Unspecified Diabetes:<br>ICD-9: 648.00; 648.01; 648.02; 648.03; 648.04;<br>ICD-10: O24.311; O24.312; O24.313; O24.319; O24.32; O24.811; O24.812; O24.813; O24.819; O24.82; O24.83; O24.911; O24.912; O24.913; O24.919; O24.92; O24.93 |

Sutton EF, Rogan SC, Lopa S, Sharbaugh D, Muldoon MF, Catov JM. Early pregnancy blood pressure elevations and risk for maternal and neonatal morbidity. *Obstet Gynecol* 2020;135.

The authors provided this information as a supplement to their article.

©2020 American College of Obstetricians and Gynecologists.

Page 2 of 7

|                                                                                        |                                                                                                                                                                                                                                                                                                                                                                                                                                                                                                                                                               |
|----------------------------------------------------------------------------------------|---------------------------------------------------------------------------------------------------------------------------------------------------------------------------------------------------------------------------------------------------------------------------------------------------------------------------------------------------------------------------------------------------------------------------------------------------------------------------------------------------------------------------------------------------------------|
| Chronic hypertension and chronic hypertension with superimposed preeclampsia diagnosis | ICD-9: 642.00; 642.01; 642.02; 642.03; 642.04; 642.10; 642.11; 642.12; 642.13; 642.14; 642.20; 642.21; 642.22; 642.23; 642.24; 642.50; 642.51; 642.52; 642.53; 642.54;<br>ICD-10: O10.011; O10.012; O10.013; O10.019; O10.02; O10.03; O10.111; O10.112; O10.113; O10.12; O10.13; O10.211; O10.212; O10.213; O10.22; O10.23; O10.311; O10.312; O10.313; O10.32; O10.33; O10.411; O10.412; O10.413; O10.419; O10.42; O10.43; O10.911; O10.912; O10.913; O10.919; O10.92; O10.93; O14.10; O14.12; O14.13; O14.14; O14.15; O14.20; O14.22; O14.23; O14.24; O14.25 |
| First delivery                                                                         | Recorded at delivery admission                                                                                                                                                                                                                                                                                                                                                                                                                                                                                                                                |
| Gestational age at first prenatal visit                                                | Calculated using first prenatal visit date, delivery date, and weeks' gestation at delivery                                                                                                                                                                                                                                                                                                                                                                                                                                                                   |
| Systolic blood pressure before 20 weeks gestation                                      | Calculated average systolic blood pressure from all available measurements before 20 weeks                                                                                                                                                                                                                                                                                                                                                                                                                                                                    |
| Diastolic blood pressure before 20 weeks gestation                                     | Calculated average diastolic blood pressure from all available measurements before 20 weeks                                                                                                                                                                                                                                                                                                                                                                                                                                                                   |
| Gestational hypertension                                                               | ICD-9: 642.30; 642.31; 642.32; 642.33; 642.34;<br>ICD-10: O13.1; O13.2; O13.3; O13.4; O13.5; O13.9                                                                                                                                                                                                                                                                                                                                                                                                                                                            |
| Term preeclampsia or eclampsia, ≥37 weeks                                              | Mild Preeclampsia:<br>ICD-9: 642.40; 642.41; 642.42; 642.43; 642.44;<br>ICD-10: O14.00; O14.02; O14.03; O14.04; O14.05<br><br>Preeclampsia with Severe Features/HELLP:<br>ICD-9: 642.5; 642.51; 642.52; 642.53; 642.54;<br>ICD-10: O14.10; O14.12; O14.13; O14.14; O14.15; O14.20; O14.22; O14.23; O14.24; O14.25<br><br>Eclampsia:<br>ICD-9: 642.60; 642.61; 642.62; 642.63; 642.64;<br>ICD-10: O15.00; O15.02; O15.03; O15.1; O15.2; O15.9                                                                                                                  |
| Severe maternal morbidity                                                              | Any of the following:<br>1. At least one of the CDC-defined variables (Appendix 3);<br>2. Admittance to the ICU, indicated by a charge code;<br>3. Postpartum length-of-stay (PPLOS) greater than three standard deviations above the mean PPLOS<br>a. PPLOS calculated using discharge date and delivery date<br>b. Average and standard deviation for PPLOS are based on the study years, 2015-Jun 2018, and delivery route; for these calculations, the range of PPLOS is limited to [0, 70]                                                               |

Sutton EF, Rogan SC, Lopa S, Sharbaugh D, Muldoon MF, Catov JM. Early pregnancy blood pressure elevations and risk for maternal and neonatal morbidity. *Obstet Gynecol* 2020;135.

The authors provided this information as a supplement to their article.

©2020 American College of Obstetricians and Gynecologists.

|                                                   |                                                                                                                                                                                                                                                  |
|---------------------------------------------------|--------------------------------------------------------------------------------------------------------------------------------------------------------------------------------------------------------------------------------------------------|
| Placental abruption                               | ICD-9: 641.20; 641.21; 641.23;<br>ICD-10: O45.001; O45.002; O45.003; O45.011; O45.012; O45.013; O45.021;<br>O45.022; O45.023; O45.091; O45.092; O45.093; O45.8X1; O45.8X2; O45.8X3;<br>O45.91; O45.92; O45.93                                    |
| Gestational diabetes                              | ICD-9: 648.80; 648.81; 648.82; 648.83; 648.84;<br>ICD-10: O24.410; O24.414; O24.415; O24.419; O24.420; O24.424; O24.425;<br>O24.429; O24.430; O24.434; O24.435; O24.439; O99.810; O99.814; O99.815                                               |
| Intrauterine fetal death after 20 weeks gestation | ICD-9: 656.40; 656.41; 656.43; 768.0; 768.1; V27.1; V27.3; V27.4; V27.6; V27.7;<br>ICD-10: O36.4XX0; O36.4XX1; O36.4XX2; O36.4XX3; O36.4XX4; O36.4XX5;<br>O36.XX9; Z37.1; Z37.3; Z37.4; Z37.60; Z27.61; Z37.62; Z37.63; Z37.64; Z37.69;<br>Z37.7 |
| Neonatal death within 28 days of life             | Using Infant Discharge Codes (below) and time from Delivery Date to Infant Discharge Date:<br>DC Code 10: CTB with autopsy<br>DC Code 12: CTB without autopsy                                                                                    |
| 5-minute Apgar < 7                                | Recorded at initial newborn exam                                                                                                                                                                                                                 |
| NICU admission                                    | Charge code for NICU admission                                                                                                                                                                                                                   |
| Small-for-gestational age                         | Calculated based on newborn birthweight and gestational age at delivery;<br><br>Using Alexander Growth Curve, <10 <sup>th</sup> percentile                                                                                                       |
| Spontaneous preterm birth, <37 weeks              | Maternal clinical summary and gestational age at delivery                                                                                                                                                                                        |
| Indicated preterm birth, <37 weeks                | Maternal clinical summary and gestational age at delivery                                                                                                                                                                                        |

Sutton EF, Rogan SC, Lopa S, Sharbaugh D, Muldoon MF, Catov JM. Early pregnancy blood pressure elevations and risk for maternal and neonatal morbidity. *Obstet Gynecol* 2020;135.

The authors provided this information as a supplement to their article.

©2020 American College of Obstetricians and Gynecologists.

### Appendix 3. Centers for Disease Control Defined Maternal Morbidity Indicators

| SMM Indicator                             | ICD-9/ICD-10 Codes                                                                                                                                                                                                                                                                                                                                                                                                                                                                                                                                                                                                                                 |
|-------------------------------------------|----------------------------------------------------------------------------------------------------------------------------------------------------------------------------------------------------------------------------------------------------------------------------------------------------------------------------------------------------------------------------------------------------------------------------------------------------------------------------------------------------------------------------------------------------------------------------------------------------------------------------------------------------|
| Amniotic fluid embolism                   | ICD-9: 673.1x;<br>ICD-10: O88.11x; O88.12; O88.13                                                                                                                                                                                                                                                                                                                                                                                                                                                                                                                                                                                                  |
| Acute myocardial infarction               | ICD-9: 410.x;<br>ICD-10: I21.01; I21.02; I21.09; I21.11; I21.19; I21.21; I21.29; I21.3; I21.4;<br>I22.0; I22.1; I22.2; I22.8; I22.9                                                                                                                                                                                                                                                                                                                                                                                                                                                                                                                |
| Severe anesthesia complications           | ICD-9: 668.0x; 668.1x; 668.2x;<br>ICD-10: O74.0; O74.1; O74.2; O74.3; O89.01; O89.09; O89.1; O89.2                                                                                                                                                                                                                                                                                                                                                                                                                                                                                                                                                 |
| Aneurysm                                  | ICD-9: 441.x;<br>ICD-10: I71.00-I71.03; I71.1-I71.6; I71.8; I71.9; I79.0                                                                                                                                                                                                                                                                                                                                                                                                                                                                                                                                                                           |
| Blood transfusion                         | ICD-9: 99.0x;<br>ICD-10: 30233J1; 30233K1; 30233N1; 30233V1; 30243J1; 30243R1;<br>30243W1; 30253R1; 30263M1; 30263N1; 30263Q1; 30263W1; 3E043GC;<br>30243V1; 30253N1; 30253Q1; 30253V1; 30253W0; 30253W1; 30233H1;<br>30243H1; 30243N0; 30243N1; 30253J1; 30253K1; 30263H0; 30263H1;<br>30263L1; 30243K1; 30253H0; 30263K1; 30263P1; 30243H0; 30243L1;<br>30263N0; 30233H0; 30243P1; 30243W0; 30263T1; 30263W0; 30233P1;<br>30233R1; 30233T1; 30233W1; 30243M1; 30253H1; 30253L1; 30253N0;<br>30253P1; 30263J1; 30263R1; 30263V1; 3E053GC; 3E063GC; 30233L1;<br>30233M1; 30233N0; 30233Q1; 30233W0; 30243Q1; 30243T1; 30253M1;<br>30253T1; 3E033GC |
| Cardiac arrest/ventricular fibrillation   | ICD-9: 427.41; 427.42; 427.5;<br>ICD-10: I46.2; I46.8; I46.9; I49.01; I49.02                                                                                                                                                                                                                                                                                                                                                                                                                                                                                                                                                                       |
| Conversion of cardiac rhythm              | ICD-9: 99.6x;<br>ICD-10: 5A2204Z; 5A12012                                                                                                                                                                                                                                                                                                                                                                                                                                                                                                                                                                                                          |
| Puerperal cerebrovascular disorders       | ICD-9: 430; 431; 432.x; 433.x; 434.x; 436; 437.x; 671.5x; 674.0x; 997.02;<br>ICD-10: I60.x; I61.x; I62.x; I63.x; I65.x; I66.x; I67.1-I67.9; I68.x; I97.810;<br>I97.811; I97.820; I97.821; O22.50; O22.51; O22.52; O22.53; O87.3                                                                                                                                                                                                                                                                                                                                                                                                                    |
| Disseminated intravascular coagulation    | ICD-9: 286.6; 286.9; 666.3x;<br>ICD-10: D65; D68.8; D68.9; O72.3                                                                                                                                                                                                                                                                                                                                                                                                                                                                                                                                                                                   |
| Eclampsia                                 | ICD-9: 642.6x;<br>ICD-10: O15.x                                                                                                                                                                                                                                                                                                                                                                                                                                                                                                                                                                                                                    |
| Heart failure during procedure or surgery | ICD-9: 997.1;<br>ICD-10: I97.12x; I97.13x                                                                                                                                                                                                                                                                                                                                                                                                                                                                                                                                                                                                          |
| Hysterectomy                              | ICD-9: 68.3x-68.9x;<br>ICD-10: OUT90ZZ; OUT94ZZ; OUT97ZZ; OUT98ZZ; OUT9FZZ                                                                                                                                                                                                                                                                                                                                                                                                                                                                                                                                                                         |
| Pulmonary edema                           | ICD-9: 428.0; 428.1; 428.821; 428.823; 428.831; 428.833; 428.841; 428.843;<br>518.4;<br>ICD-10: I50.1; I50.20; I50.21; I50.23; I50.30; I50.31; I50.33; I50.40; I50.41;<br>I50.43; I50.9; J81.0                                                                                                                                                                                                                                                                                                                                                                                                                                                     |
| Acute renal failure                       | ICD-9: 584.x; 669.3x;                                                                                                                                                                                                                                                                                                                                                                                                                                                                                                                                                                                                                              |

Sutton EF, Rogan SC, Lopa S, Sharbaugh D, Muldoon MF, Catov JM. Early pregnancy blood pressure elevations and risk for maternal and neonatal morbidity. *Obstet Gynecol* 2020;135.

The authors provided this information as a supplement to their article.

©2020 American College of Obstetricians and Gynecologists.

| <b>SMM Indicator</b>                | <b>ICD-9/ICD-10 Codes</b>                                                                                                                                        |
|-------------------------------------|------------------------------------------------------------------------------------------------------------------------------------------------------------------|
|                                     | ICD-10: N17.x; O90.4                                                                                                                                             |
| Adult respiratory distress syndrome | ICD-9: 518.5x; 518.81; 518.82; 518.84; 799.1;<br>ICD-10: J80; J95.1; J95.2; J95.3; J95.82x; J96.0x; J96.2x; R09.2                                                |
| Sepsis                              | ICD-9: 038.x; 670.2x; 995.91; 995.92;<br>ICD-10: A32.7; A40.x; A41.x; O85; R65.2x; T80.211A; T81.4XXA                                                            |
| Shock                               | ICD-9: 669.1x; 785.5x; 995.0; 995.4; 998.0x;<br>ICD-10: O75.1; R57.0; R57.1; R57.8; R57.9; R65.21; T78.2XXA; T81.10XA;<br>T81.11XA; T81.19XA; T88.2XXA; T88.6XXA |
| Sickle cell anemia with crisis      | ICD-9: 282.42; 282.62; 282.64; 282.69;<br>ICD-10: D57.0x; D57.21x; D57.41x; D57.81x                                                                              |
| Thrombotic embolism                 | ICD-9: 415.1x; 673.0x; 673.2x; 673.3x; 673.8x;<br>ICD-10: I26.x; O88.0x; O88.2x; O88.3x; O88.8x                                                                  |
| Temporary tracheostomy              | ICD-9: 31.1;<br>ICD-10: OB110F4; OB110Z4; OB113F4; OB113Z4; OB114F4; OB114Z4                                                                                     |
| Ventilation                         | ICD-9: 93.90; 96.01; 96.02; 96.03; 96.04; 96.05; 967.x;<br>ICD-10: 5A1935Z; 5A1945Z; 5A1955Z                                                                     |

Sutton EF, Rogan SC, Lopa S, Sharbaugh D, Muldoon MF, Catov JM. Early pregnancy blood pressure elevations and risk for maternal and neonatal morbidity. *Obstet Gynecol* 2020;135.

The authors provided this information as a supplement to their article.

©2020 American College of Obstetricians and Gynecologists.

**Appendix 4. Frequency and Average Blood Pressure by AHA/ACC 2017 Systolic and Diastolic Classification Criteria**

| Classification Criteria                                                              |                                                            | N (%)      | Systolic BP | Diastolic BP |
|--------------------------------------------------------------------------------------|------------------------------------------------------------|------------|-------------|--------------|
| Stage 1 HTN<br>(n=988),<br>defined by:                                               | Average systolic BP only                                   | 216 (21.9) | 132.2 ± 2.2 | 72.3 ± 5.7   |
|                                                                                      | Average diastolic BP only                                  | 671 (67.9) | 121.1 ± 5.0 | 81.6 ± 1.8   |
|                                                                                      | Both average systolic and diastolic BP                     | 101 (10.2) | 133.2 ± 2.7 | 83.1 ± 2.2   |
| Stage 2 HTN<br>(n=1,005),<br>defined by:                                             | Average systolic BP only                                   | 94 (9.4)   | 144.9 ± 5.5 | 80.6 ± 6.2   |
|                                                                                      | Average diastolic BP only                                  | 43 (4.3)   | 132.1 ± 5.5 | 92.5 ± 2.2   |
|                                                                                      | Both average systolic and diastolic BP                     | 32 (3.2)   | 148.2 ± 8.0 | 94.5 ± 3.8   |
|                                                                                      | Chronic HTN diagnosis, with average BP below stage 2 range | 836 (83.2) | 125.5 ± 7.9 | 75.2 ± 7.6   |
| BP, blood pressure; HTN, hypertension<br>Data are n (%) or mean ± standard deviation |                                                            |            |             |              |

Sutton EF, Rogan SC, Lopa S, Sharbaugh D, Muldoon MF, Catov JM. Early pregnancy blood pressure elevations and risk for maternal and neonatal morbidity. *Obstet Gynecol* 2020;135.

The authors provided this information as a supplement to their article.

©2020 American College of Obstetricians and Gynecologists.
